# Supplementary material
Source: Springer Nature journal article supplement (https://www.springermedizin.de/resource/supplementary/12875_2001_6_MOESM1_ESM.rtf/9436096)
Supplement: MOESM1 [file 9436096]

Extract 4 – Bengali mothers in a Sylheti session discussing the possible effect of the condition 
C. Difficult to get a job, there will be problems at school, he won't be able to play games or take exercise
E. He'll have problems sleeping
F. He won't be able to eat cold foods like ice cream
E. He'll have problems doing most things
B. He can do everything, but he just has to be careful… It lasts a whole life, but it can be controlled, there's no cure
E. Yes it can be controlled by medication, my father in law has to carry an inhaler with him all the time 

See Additional file 1 for key to coding used in extract	
